# Supplementary material for: ICT-based fluorescent ratiometric probe for monitoring mitochondrial peroxynitrite in living cells
Source: Royal Society of Chemistry journal article supplement (doi:10.1039/d1nj01713f), 2021-01-01
Supplement: d1nj01713f1.pdf [file d1nj01713f1.pdf]

## Supplementary Information

**An ICT-based fluorescent ratiometric probe for monitoring mitochondrial peroxynitrite in living cells**

Yuting Du\*, Hongliang Wang, Ting Zhang, Wei Wen, Minmin Guo

*Department of Chemistry, Xinzhou Teachers University, Xinzhou, Shanxi 034000,  
China*

**Table S1** A comparison of the ratiometric fluorescent probes for the detection of ONOO<sup>-</sup>.

| Probe                                                                               | Response mechanism    | $\lambda_{em1}$ / $\lambda_{em2}$ (nm) | Emission shift (nm) | Mitochondria-targeting | Ref. |
|-------------------------------------------------------------------------------------|-----------------------|----------------------------------------|---------------------|------------------------|------|
| 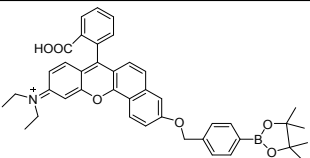   | ICT                   | 560/630                                | 70                  | No                     | 50   |
| 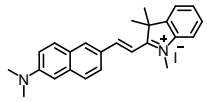   | Oxidization, Cleavage | 535/718                                | 183                 | Yes                    | 33   |
| 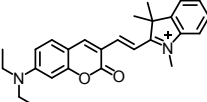   | Oxidization, Cleavage | 515/635                                | 120                 | Yes                    | 32   |
| 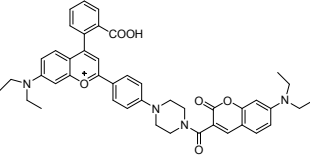  | FRET                  | 473/651                                | 173                 | Yes                    | 31   |
| 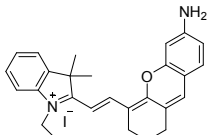 | Oxidization, Cleavage | 460/708                                | 248                 | Yes                    | 34   |
| 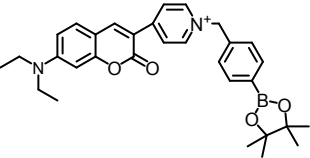 | Oxidization, Cleavage | 500/565                                | 65                  | No                     | 51   |
| 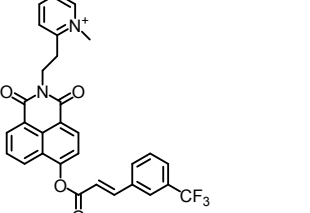 | Oxidization, Cleavage | 454/558                                | 104                 | Yes                    | 52   |

### ***Synthesis of compound 2***

To a solution of 40% dimethylamine solution (5 mL, 44 mmol) was added compound 1 (2.0 g, 9 mmol) and Na<sub>2</sub>S<sub>2</sub>O<sub>5</sub> (3.57 g, 19 mmol) in H<sub>2</sub>O (30 mL). The mixture was stirred at 140° C for 48 h. After cooling to room temperature, the mixture was filtered and wash with water. Next, it was extracted with dichloromethane and water. Purification on silicagel afforded compound 2 as solid (1.1 g, 49%). <sup>1</sup>H-NMR (400 MHz, CDCl<sub>3</sub>) δ 7.84 (d, *J* = 1.6 Hz, 1H), 7.62 (d, *J* = 9.2 Hz, 1H), 7.53 (d, *J* = 8.8 Hz, 1H), 7.44 (dd, *J* = 8.8, 2.0 Hz, 1 H), 7.18 (dd, *J* = 9.2, 2.8 Hz, 1 H), 6.88 (d, *J* = 1.6 Hz, 1H), 3.02 (s, 6H). <sup>13</sup>C-NMR (100 MHz, CDCl<sub>3</sub>) δ 148.72, 133.47, 129.39, 127.88, 127.85, 127.80, 117.09, 115.08, 106.14, 40.76.

### ***Synthesis of compound 3***

Under N<sub>2</sub> atmosphere, n-BuLi (1.056 mL, 2.5 M in hexane, 2.9 mmol) was added to compound 2 (689 mg, 2.8 mmol) in dry THF and cooled to -78 °C. The mixture was stirred at refluxed for 45 min. Then, dimethylformamide (DMF) (0.44 mL, 5.5 mmol) was added and continue reacted 2 h. After cooling to room temperature, the reaction was quenched with a saturated ammonium chloride solution and extracted with ethyl acetate. the solvent was evaporated under reduced pressure. The residue was purified by the silica gel chromatography using Petroleum ether\ethyl acetate as eluent to afford compound 3 as a atrovirens solid (480 mg, 85% yield). <sup>1</sup>H NMR (400 MHz, CDCl<sub>3</sub>) δ 10.00 (s, 1H), 8.13 (s, 1H), 7.82 (m, 2H), 7.65 (d, *J* = 8.4 Hz, 1H), 7.17 (dd, *J* = 9.2, 2.4 Hz, 1 H), 6.88 (s, 1H), 3.11 (s, 6H). <sup>13</sup>C-NMR (100 MHz, DMSO-d<sub>6</sub>) δ 191.81, 150.57, 138.64, 134.78, 130.77, 130.69, 126.85, 125.14,

123.54, 116.26, 105.59, 40.43.

### ***Synthesis of Compound DMANI***

Under N<sub>2</sub> atmosphere, compound 3 (80 mg, 0.4 mmol) and 1,2,3,3-tetramethyl-3H-indol-1-ium (121 mg, 0.7 mmol) were dissolved in 8 mL ethyl alcohol. Then, 0.5 mL of piperidine was added to the flask. The reaction mixture was refluxed overnight. After being cooled to room temperature, the mixture was filtered and wash with diethyl ether to obtain an atrovirens solid. The crude product was then purified by flash silica gel chromatography column to yield atrovirens solid **DMANI** (55 mg, 39% yield). <sup>1</sup>H NMR (400 MHz, DMSO-d<sub>6</sub>) δ 8.53 (d, *J* = 9.2 Hz, 1H), 8.48 (s, 1H), 8.19 (d, *J* = 8.8 Hz, 1H), 7.85 (dd, *J* = 7.2, 3.6 Hz, 3H), 7.77 (d, *J* = 8.8 Hz, 1H), 7.59 (t, 3H), 7.30 (dd, *J* = 9.2, 2.0 Hz, 1H), 7.03 (d, *J* = 2.0 Hz, 1H), 4.11 (s, 3H), 3.13 (s, 6H), 1.81 (s, 6H). <sup>13</sup>C-NMR (100 MHz, DMSO-d<sub>6</sub>) δ 181.26, 154.40, 151.29, 143.67, 142.43, 138.20, 136.12, 131.45, 129.33, 129.08, 128.30, 127.28, 125.47, 125.06, 123.27, 125.47, 125.08, 123.27, 116.99, 115.01, 110.08, 105.84, 56.48, 52.08, 34.37, 26.18, 19.04. HRMS (ESI) Calcd. for C<sub>25</sub>H<sub>27</sub>N<sub>2</sub> (M+H)<sup>+</sup>: 355.2158, Found 355.2169

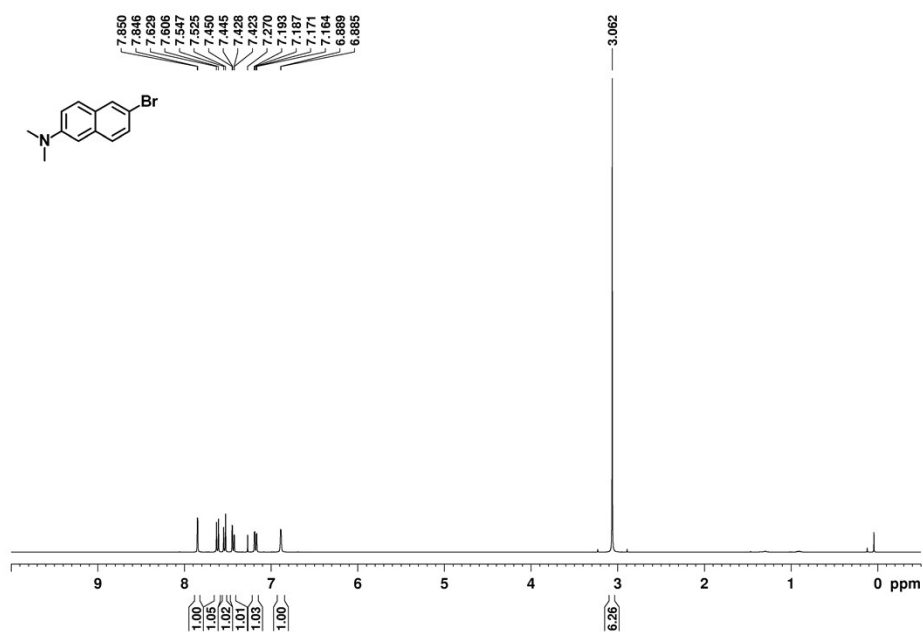

**Figure S1** <sup>1</sup>H NMR spectra of compound 2 in CDCl<sub>3</sub>.

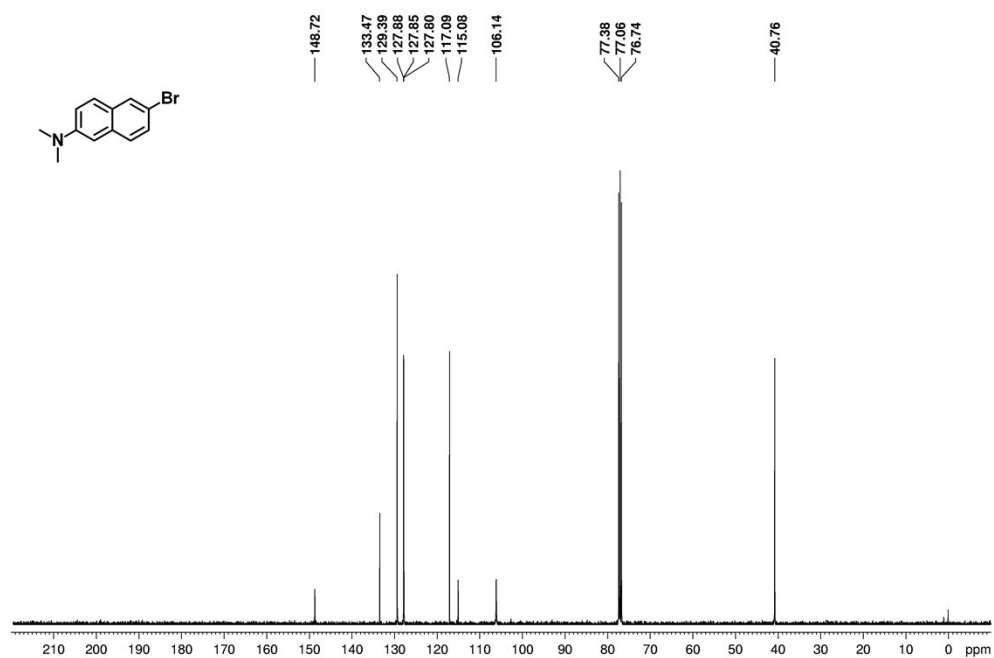

**Figure S2** <sup>13</sup>C NMR spectra of compound 2 in CDCl<sub>3</sub>.

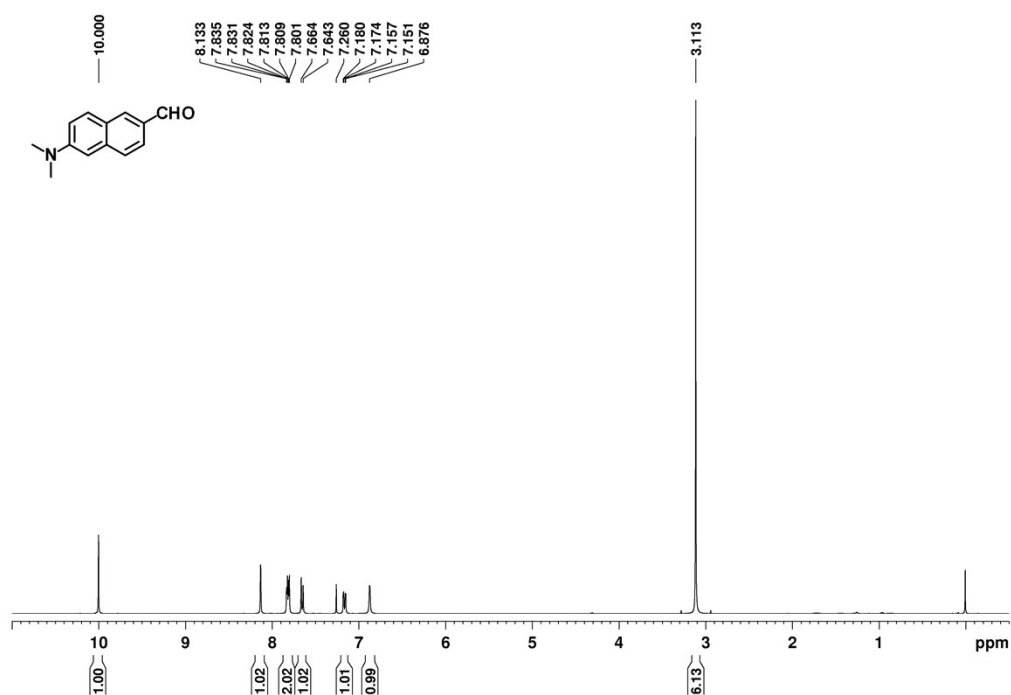

**Figure S3** <sup>1</sup>H NMR spectra of compound 3 in CDCl<sub>3</sub>.

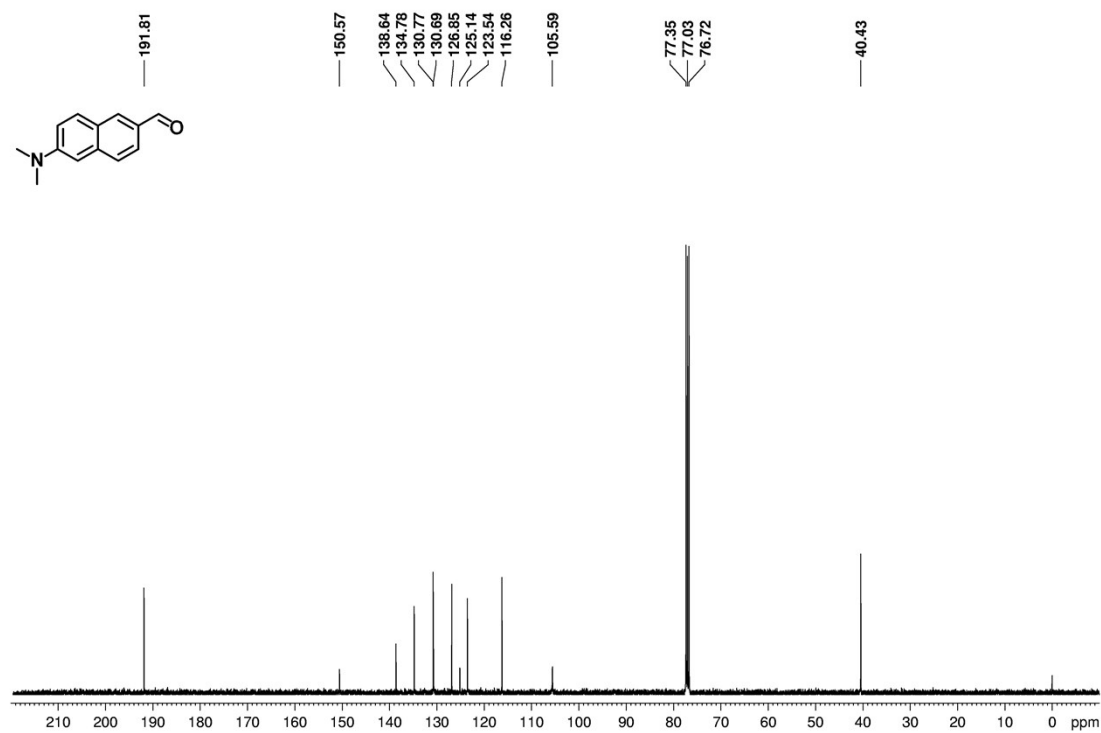

**Figure S4** <sup>13</sup>C NMR spectra of compound 3 in CDCl<sub>3</sub>.

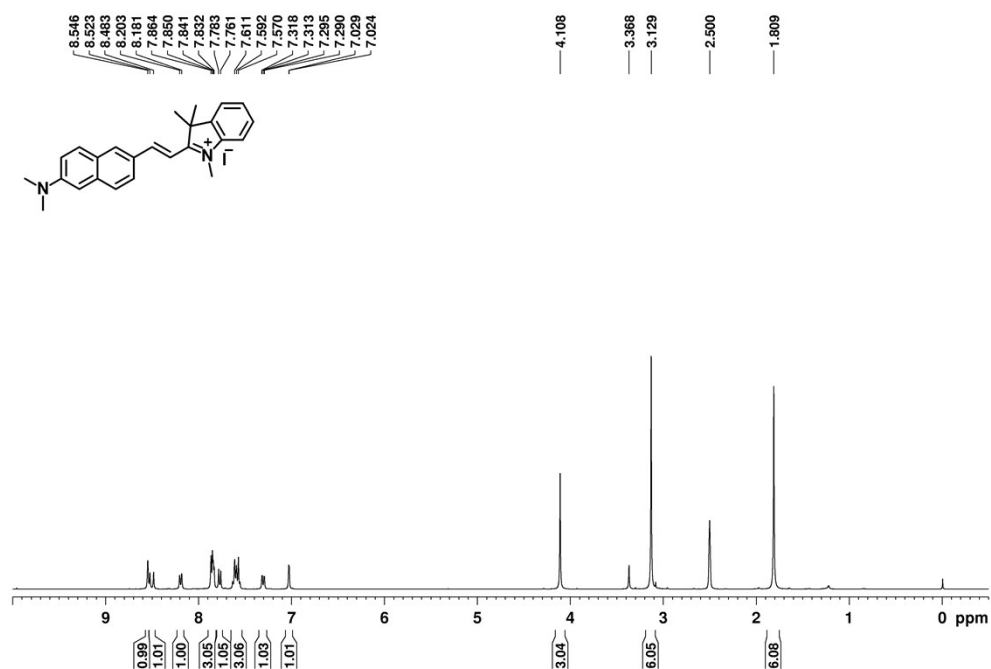

**Figure S5** <sup>1</sup>H NMR spectra of **DMANI** in DMSO-d<sub>6</sub>.

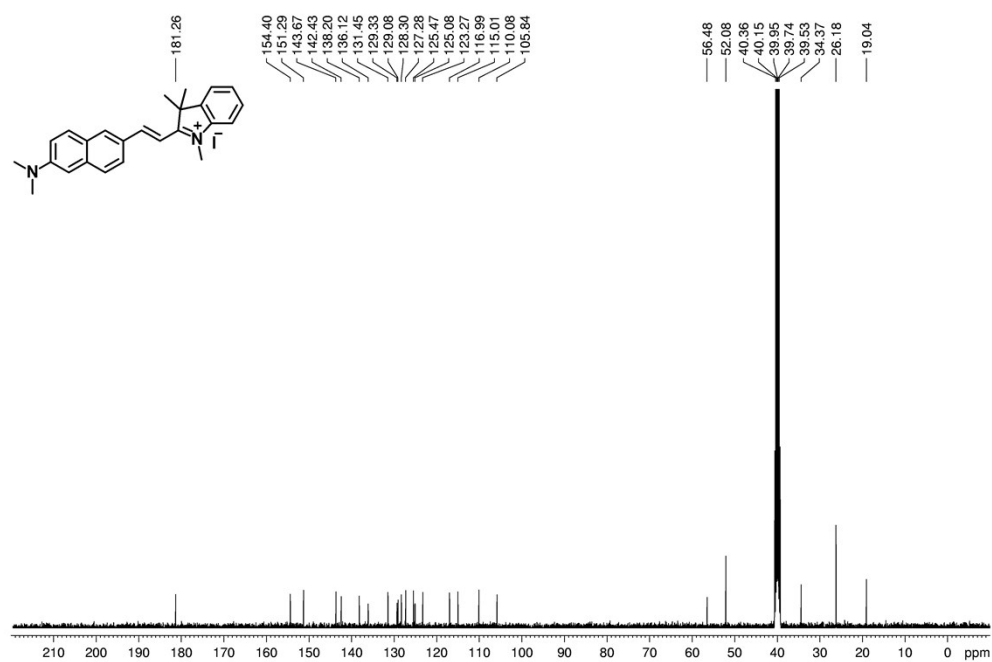

**Figure S6** <sup>13</sup>C NMR spectra of **DMANI** in DMSO-d<sub>6</sub>.

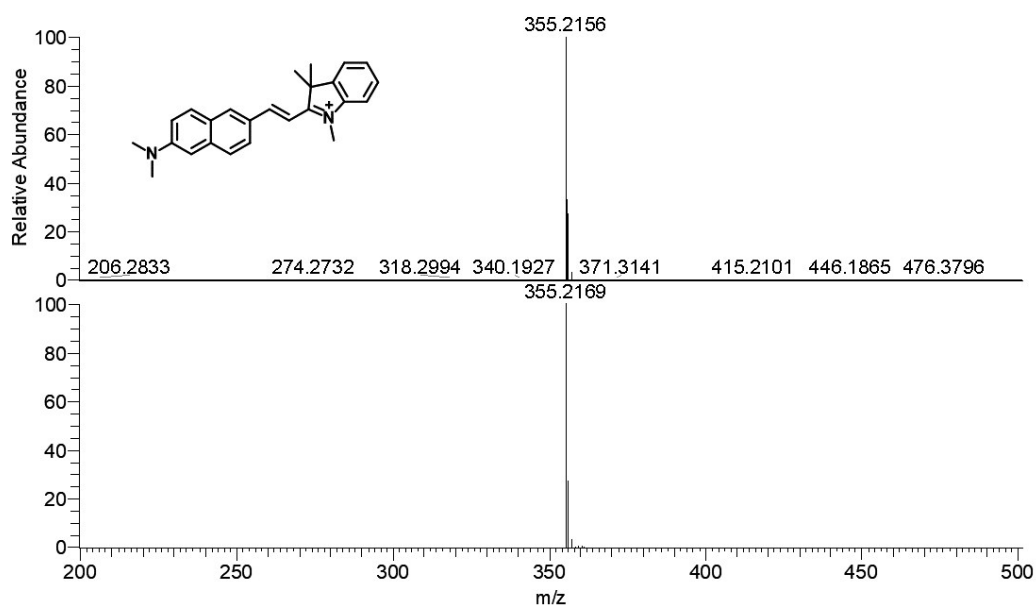

**Figure S7** Mass spectra of **DMANI**.

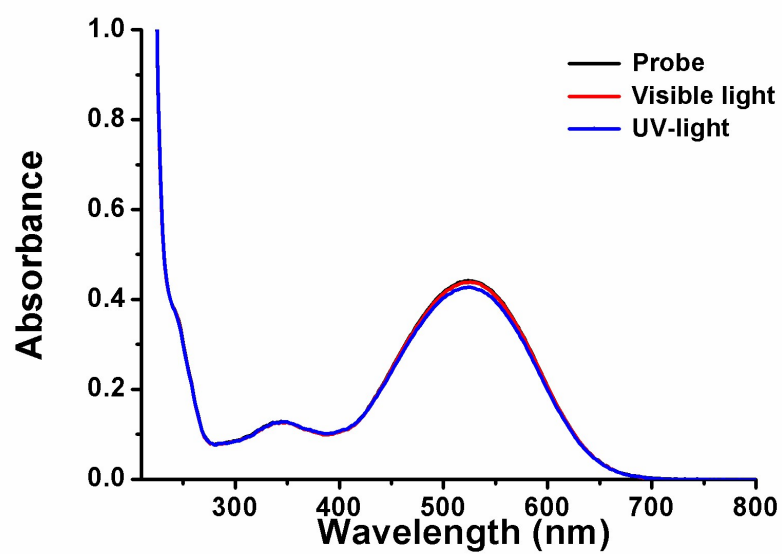

**Figure S8** Photostability of the probe **DMANI**.

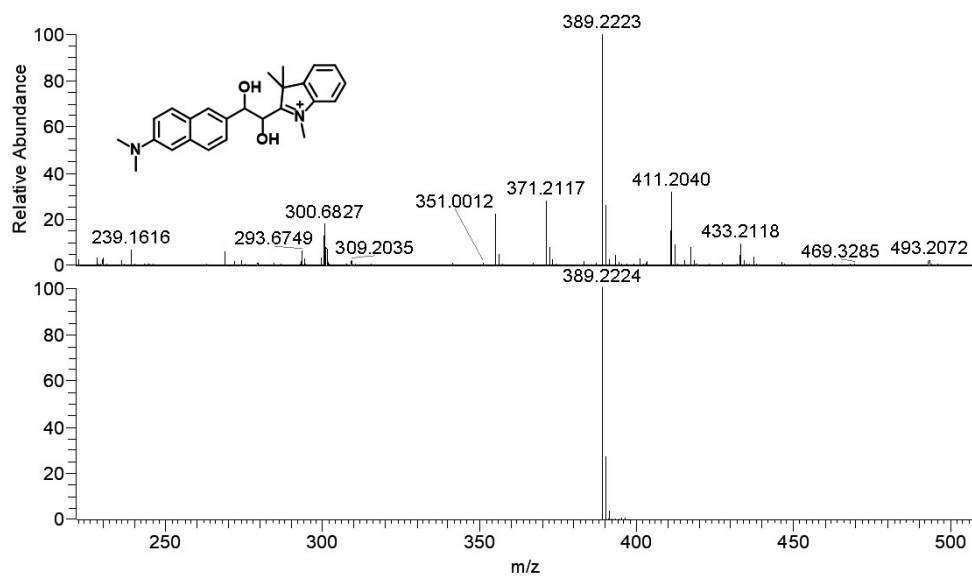

**Figure S9** HRMS spectrum recorded after mixing **DMANI** (5  $\mu$ M) and  $\text{ONOO}^-$  (30  $\mu$ M).

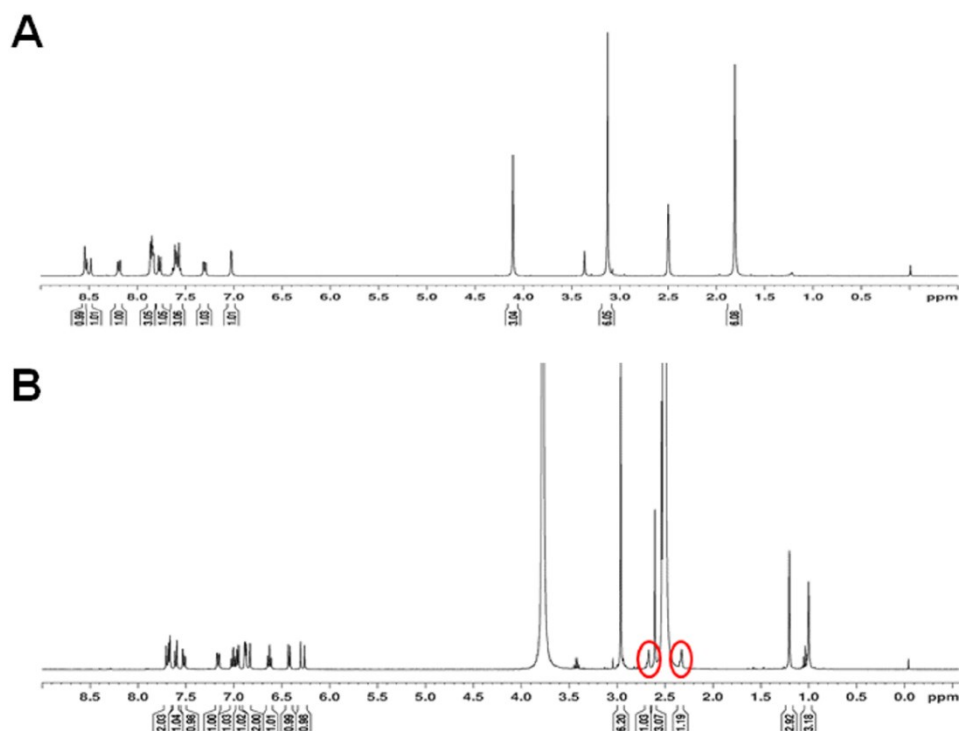

**Figure S10**  $^1\text{H}$  NMR spectrum recorded **DMANI** (A) or after mixing **DMANI** (5  $\mu$ M) and  $\text{ONOO}^-$  (30  $\mu$ M).

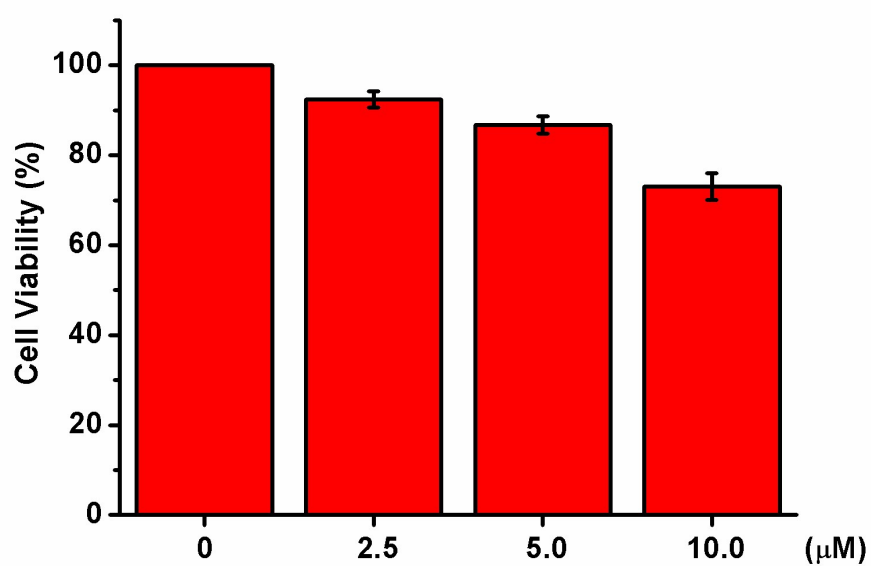

**Figure S11** Cell viability of HepG2 cells treated with different concentrations of **DMANI** for 24 h.
